# Supplementary material for: The Genomic Landscape of the Ewing Sarcoma Family of Tumors Reveals Recurrent STAG2 Mutation
Source: PubMed Central journal article supplement (PMC4091782; doi:10.1371/journal.pgen.1004475), 2014-07-10
Supplement: pgen.1004475.s005.pdf [file pgen.1004475.s005.pdf]

Representative examples of STAG2 positive tumors

PT10

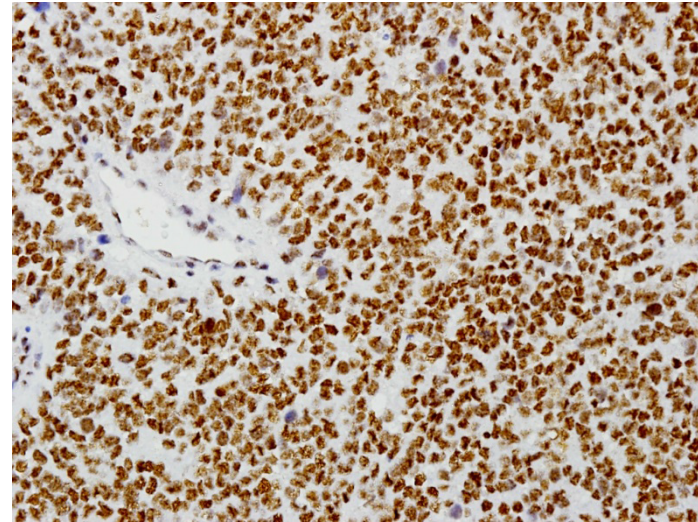

PT110

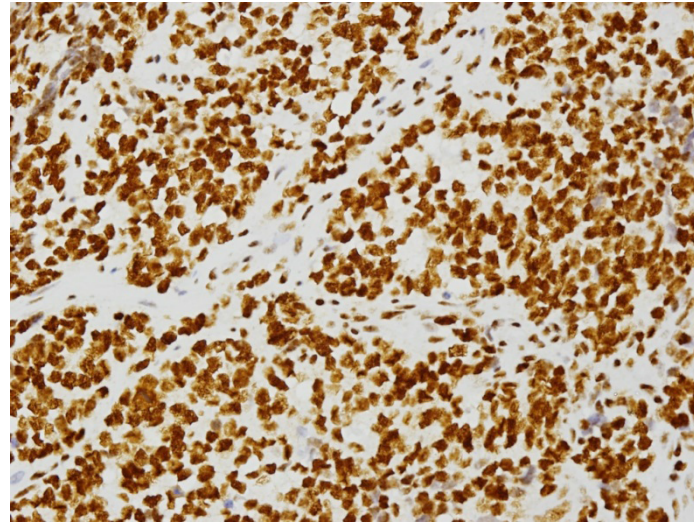

PT780

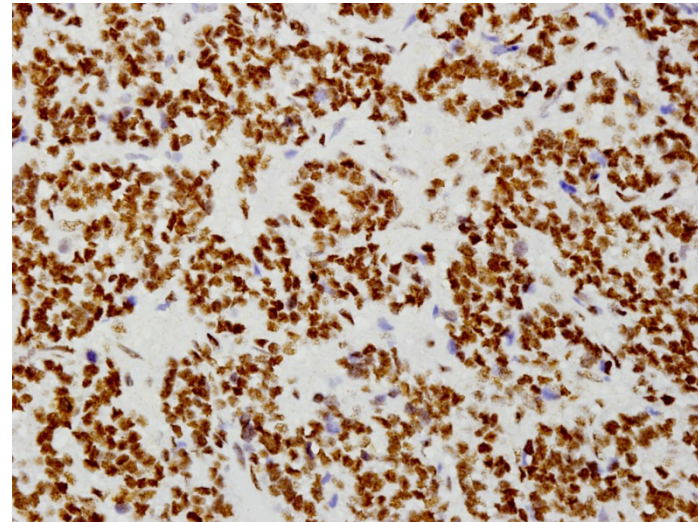

PT781

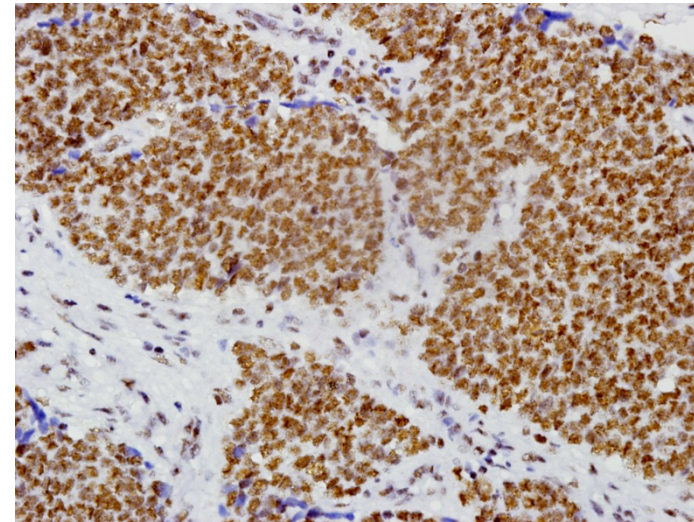

Representative examples of STAG2 negative tumors

PT244

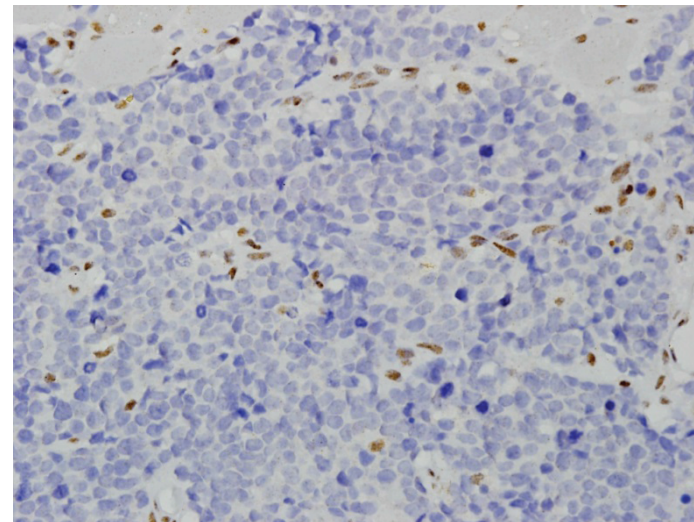

PT308

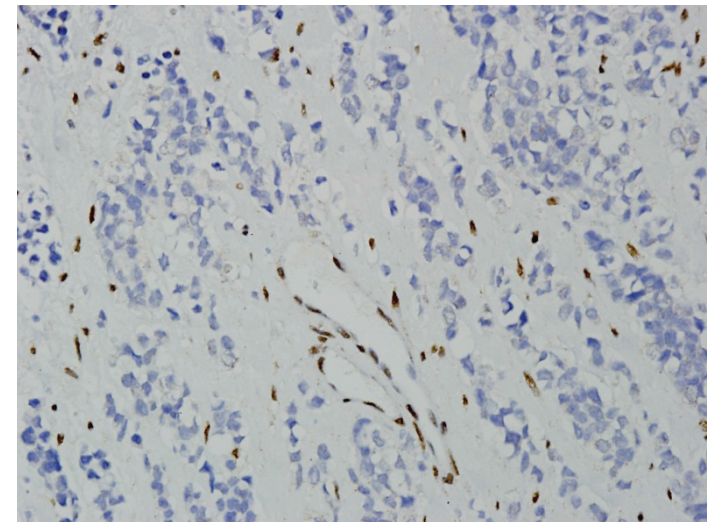

PT771

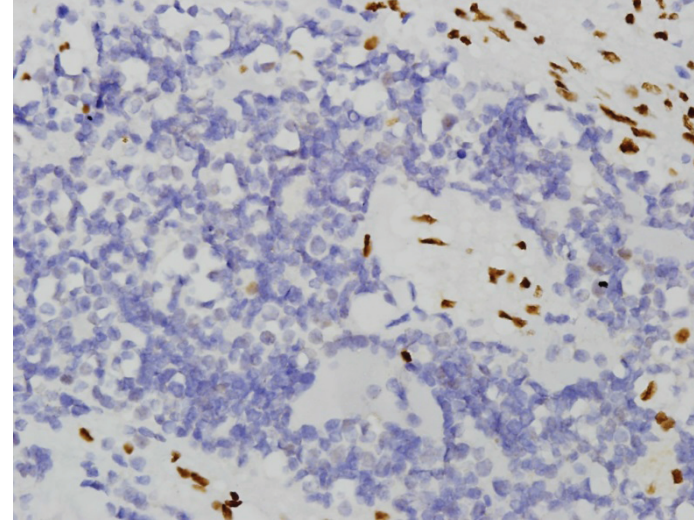

PT774

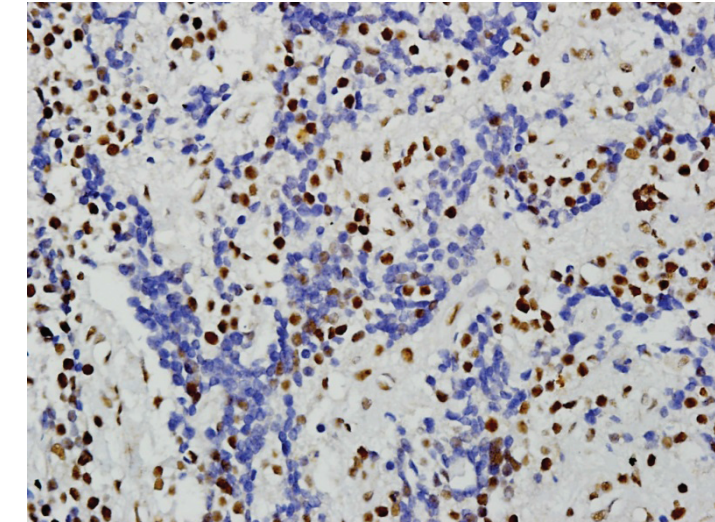

mosaic tumor
