# Supplementary material for: The Genomic Landscape of the Ewing Sarcoma Family of Tumors Reveals Recurrent STAG2 Mutation
Source: PubMed Central journal article supplement (PMC4091782; doi:10.1371/journal.pgen.1004475), 2014-07-10

A

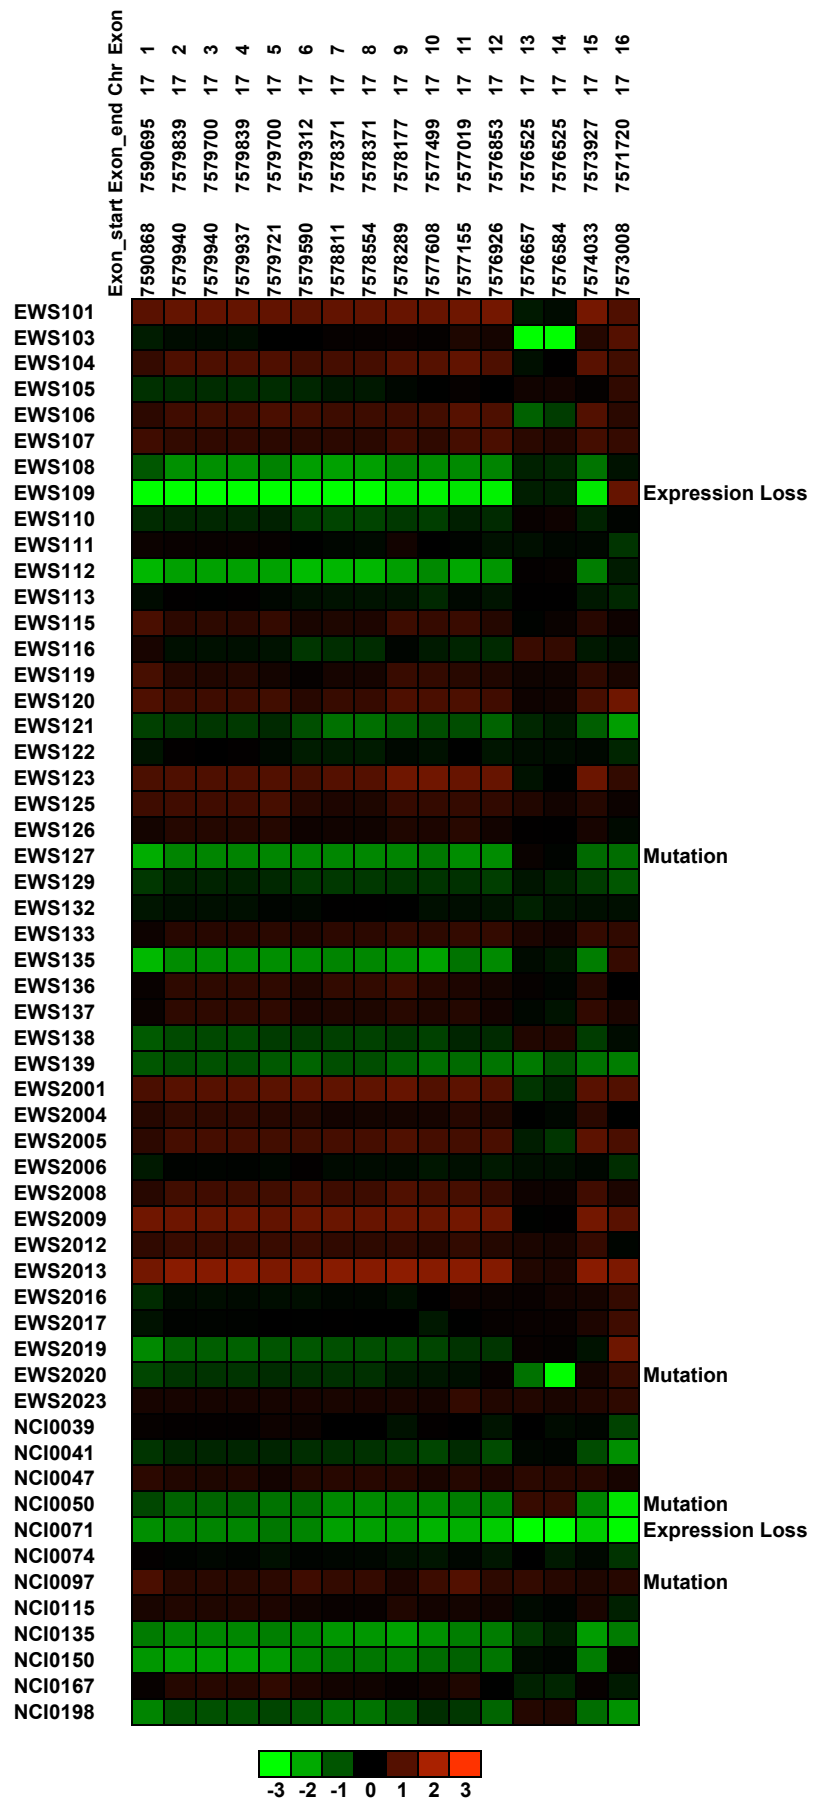

B

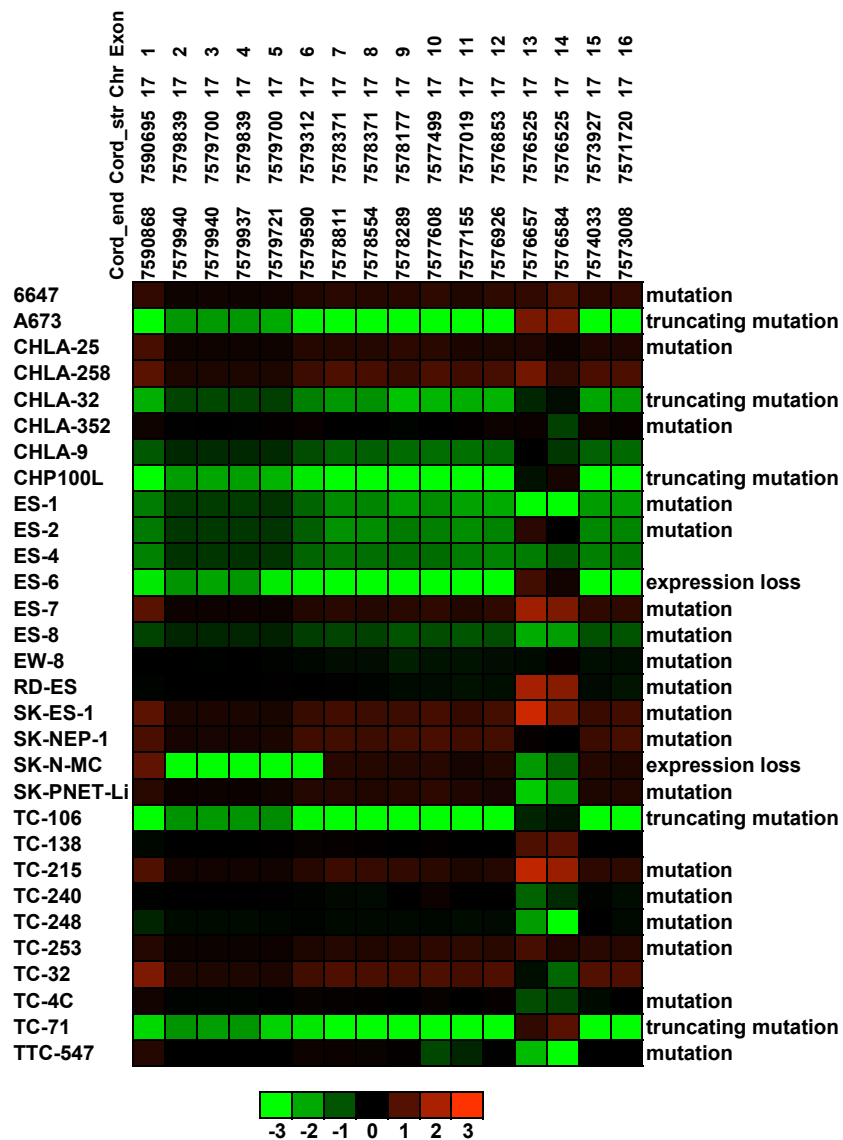

Supplement: pgen.1004475.s006.pdf [file pgen.1004475.s006.pdf]
