# Supplementary material for: The Genomic Landscape of the Ewing Sarcoma Family of Tumors Reveals Recurrent STAG2 Mutation
Source: PubMed Central journal article supplement (PMC4091782; doi:10.1371/journal.pgen.1004475), 2014-07-10

**A**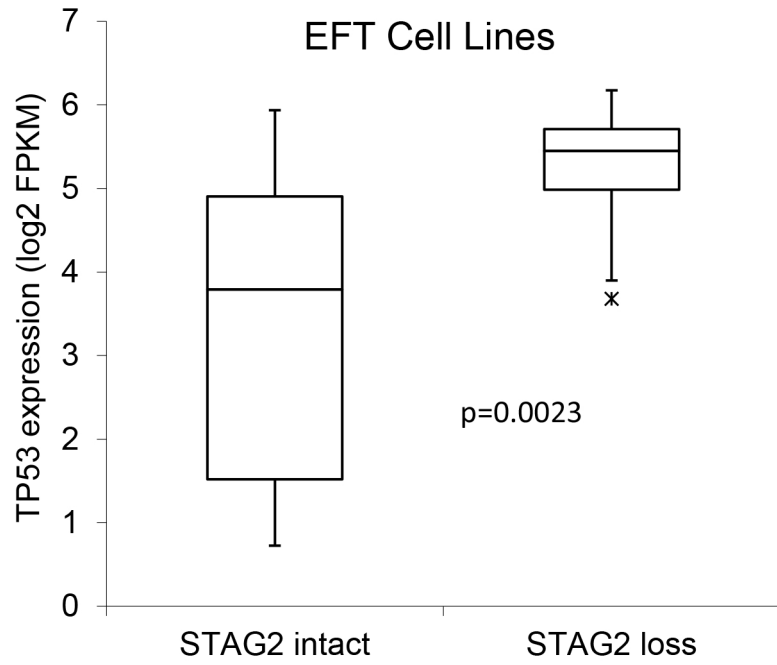**B**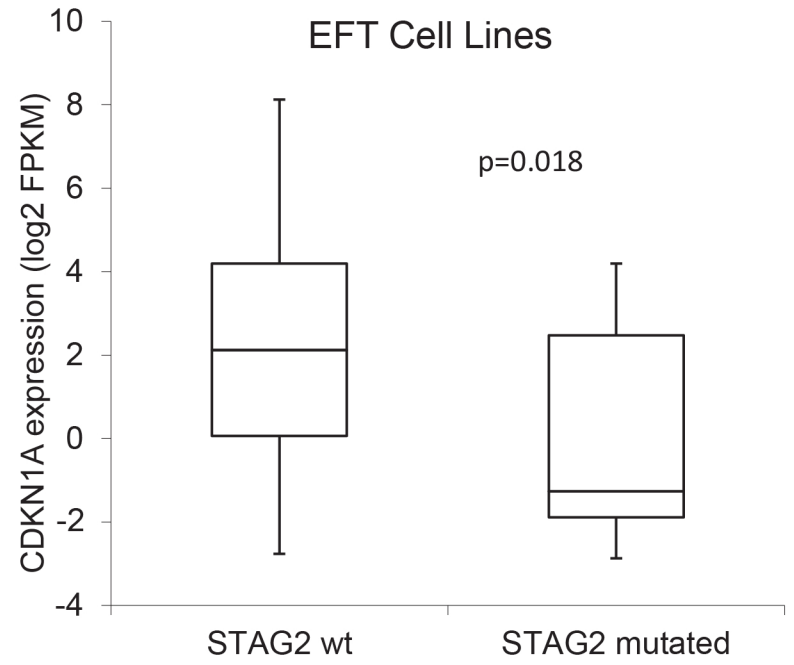**C**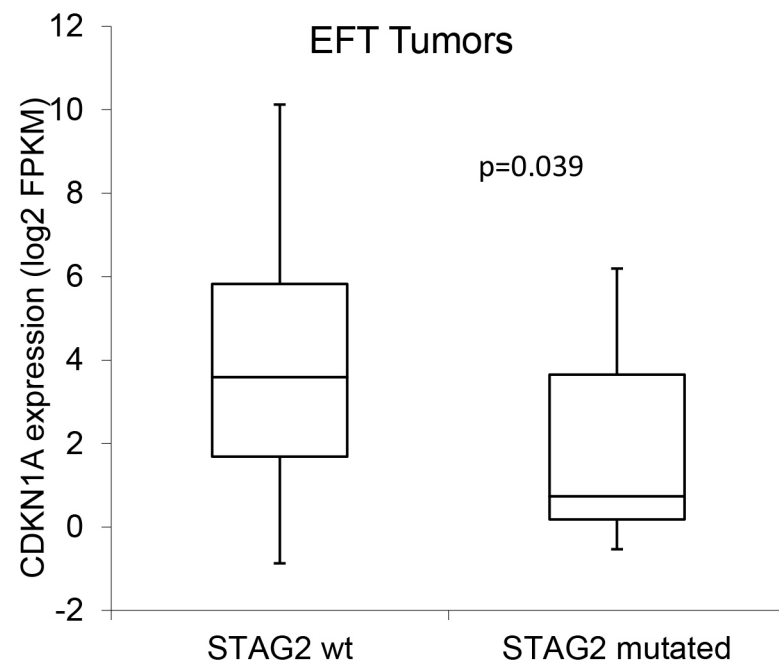

Supplement: pgen.1004475.s009.pdf [file pgen.1004475.s009.pdf]
